# Supplementary material
Source: publisher site journal article supplement (https://www.dovepress.com/article/405485)
Supplement: Supplementary file 1 [file get_supplementary_file.php]

**Supplementary materials**

***Grouping of discharge diagnoses***
An initial overview of discharge diagnoses revealed over 3000 individual ICD-10 codes registered in our population.A large proportion of these were only registered once or twice, demanding a method of grouping them if we were to include discharge diagnosis as a variable in our model. Since four digit ICD-10 grouping has previously been shown to be an ineffective mean of categorizing diagnoses, we manually grouped relevant discharge diagnoses into new clinically relevant categories.21 Screening was, for all but infectious diseases, done based on the 4-digit ICD-10 codes. For infectious diseases we chose to use their 5-digit ICD-10 code. If two or more diagnoses were deemed comparable in an acute, clinical setting, the two were combined into one. For example, ´Dehydration´ (DE86) and ´Other disorders of fluid, electrolyte, and acid balance´ (DE87) were merged into the same category. Different types of pneumonia and bronchitis were also merged into a new category called ´Lower respiratory tract infections´. When deemed relevant, further subdivision of these categories was performed to examine their contents. When examined on a full digit basis, we found that some ambiguous diagnoses contained multiple dissimilar diseases. For example, ´Other functional intestinal disorders´ included both constipation and diarrhea, and thus we allowed for these two to be separated into their own respective categories. Finally, based on this new grouping, the top 50 most frequent diagnostic categories were chosen. The remaining diagnoses that did not make it into the top 50 were instead input as their overall disease category, resulting in a total of 66 distinctive diagnostic groups, 16 of which were comprised of overall disease categories. These were grouped based on a modified version of the Vest-Hansen ICD-10 as previously described by Gregersen et. al.4,22 For example, acute pyelonephritis was input as ´Other infectious diseases´, since it did not make the top 50 in this new diagnostic grouping. See below table for a complete overview of the groupings. All 66 diagnostic groups were input into the model as individual, binary variables.

The top 50 diagnostic groups are sorted alphabetically based on the first ICD-10 code in the group and are separated from the remaining 16 disease categories in the below table. Due to Danish law on data protection (GDPR), rows with numbers ≤5 have been concealed and replaced by a ‘*’ instead.

**Table S1** Diagnostic grouping and frequency according to survival status

| **Diagnostic groups** | **ICD10 codes, including subgroups*** | **Total cohort,** n= 107,132 | **Alive,** n= 103,557 (96.7%) | **Dead,** n= 3,575 (3.3%) |
| --- | --- | --- | --- | --- |
| Gastroenteritis or gastrocolitis | DA020,DA039,DA044,DA045,DA047, DA048,DA049,DA050,DA051,DA058,  DA059,DA081, DA082,DA083,DA084, DA085,DA090, DA099 | 827 (0.8%) | 811 (0.8%) | 16 (0.4%) |
| Other skin and subcutaneous infections | DA184A,DA260,DA268,DA692F,DB001,DB001C, DB029,DB084,DB099A, DB350A,DB354,DB354A,DB368,DB369,DB370A,DB378,DB378C,DB379,DL00, DL01,DL02,DL03,DL05,DL06,DL07, DL08,DL88 | 597 (0.6%) | 590 (0.6%) | 7 (0.2%) |
| Anemia (not including acute posthemorrhagic anemia) | DD50,DD51,DD52,DD53,DD58,DD59, DD60,DD61,DD63,DD64 | 1,841 (1.7%) | 1,731 (1.7%) | 110 (3.1%) |
| Diabetes (type 1, type 2, other, non-specified) | DE10,DE11,DE13,DE14 | 506 (0.5%) | 488 (0.5%) | 18 (0.5%) |
| Dehydration. Other disorders of fluid, electrolyte, and acid-base balance | DE86,DE87 | 3,233 (3.0%) | 2,960 (2.9%) | 273 (7.6%) |
| Epilepsy. Status epilepticus | DG40,DG41 | 531 (0.5%) | 512 (0.5%) | 19 (0.5%) |
| Hypertensive diseases | DI10,DI11,DI12,DI15 | 1,690 (1.6%) | 1,668 (1.6%) | 22 (0.6%) |
| Brain bleeding, infarction, or stroke | DI60,DI61,DI62,DI63,DI64 | 712 (0.7%) | 679 (0.7%) | 33 (0.9%) |
| Upper respiratory tract infection | DJ009,DJ010,DJ011,DJ013,DJ014, DJ019,DJ020,DJ029,DJ029B,DJ030, DJ039,DJ039A,DJ039C,DJ040,DJ041, DJ042,DJ068,DJ069,DJ091,DJ091A, DJ091B,DJ101,DJ101A,DJ101B,DJ108,DJ108A,DJ111,DJ111A,DJ111B,DJ118, DJ118B,DA370,DA379,DA492,DJ050 | 616 (0.6%) | 607 (0.6%) | 9 (0.3%) |
| Lower respiratory tract infections, pneumonia, bronchitis | DJ100,DJ110,DJ121,DJ128,DJ128A, DJ129,DJ139,DJ149,DJ150,DJ151, DJ152,DJ153,DJ154,DJ155,DJ156, DJ157,DJ158,DJ159,DJ168,DJ171, DJ178,DJ180,DJ181,DJ188,DJ189, DA162,DB401,DJ200,DJ204,DJ205, DJ209,DJ209A,DJ210,DJ219,DJ229, DJ40,DJ41,DJ42,DB960,DB974, DJ440,DJ20,DJ21 | 3,826 (3.6%) | 3,575 (3.5%) | 251 (7.0%) |
| Other infections of the digestive system | DK040,DK046,DK047,DK052,DK112, DK113,DK122,DK130A,DK140A, DK209A,DK230,DK231,DK35,DK37, DK61,DK630,DK650,DK658I,DK67, DK750,DK751,DK770,DK830,DK859, DK930,DK931,DK800,DK803,DK804, DK810 | 549 (0.5%) | 541 (0.5%) | 8 (0.2%) |
| Hernias (not including hiatus hernias) | DK40,DK41,DK42,DK43, DK45,DK46 | 716 (0.7%) | 704 (0.7%) | 12 (0.3%) |
| Complicated diverticulitis | DK57,DK570,DK572,DK572A,DK572B, DK572C,DK574,DK578 | 1,036 (1.0%) | 1,026 (1.0%) | 10 (0.3%) |
| Constipation | DK590, DK590A | 1,502 (1.4%) | 1,456 (1.4%) | 46 (1.3%) |
| Perianal/perirectal hemorrhoids, hematomas, and fissures, other diseases of anus and rectum | DK60, DK62, DK64 | 1,198 (1.1%) | 1,149 (1.1%) | 49 (1.4%) |
| Urinary tract stones | DN20,DN21 | 639 (0.6%) | * | * |
| Cystitis | DN300,DN302,DN308,DN308A,DN308B, DN308C,DN308E,DN309,DN390 | 3,542 (3.3%) | 3,316 (3.2%) | 226 (6.3%) |
| Traumatic injuries, lesions, fractures | DS00,DS01,DS02,DS03,DS04,DS05, DS07,DS09,DS10,DS12,DS13,DS14, DS15,DS19,DS20,DS21,DS22,DS23, DS24,DS27,DS29,DS30,DS31,DS32, DS33,DS34,DS35,DS36,DS37,DS39, DS40,DS41,DS42,DS43,DS44,DS46, DS50,DS51,DS52,DS53,DS54,DS55, DS60,DS61,DS62,DS63,DS64,DS66, DS67,DS68,DS69,DS70,DS71,DS72, DS73,DS75,DS76,DS79,DS80,DS81, DS82,DS83,DS84,DS86,DS89,DS90, DS91,DS92,DS93,DS94,DS96,DS99, DT00,DT01,DT07,DT09,DT11,DT13, DT14 | 2,042 (1.9%) | 1,975 (1.9%) | 67 (1.9%) |
| Poisoning | DT38,DT39,DT40,DT41,DT42,DT43, DT44,DT45,DT46,DT48,DT49,DT50, DT51,DT52,DT54,DT55,DT58,DT59, DT61,DT62,DT63,DT65 | 832 (0.8%) | 818 (0.8%) | 14 (0.4%) |
| Complications of surgical and medical care, not elsewhere classified | DT80,DT81,DT82,DT83,DT84,DT85, DT86,DT87,DT88 | 1,462 (1.4%) | 1,430 (1.4%) | 32 (0.9%) |
| Erysipelas | DA469 | 832 (0.8%) | 807 (0.8%) | 25 (0.7%) |
| Alcohol related disorders | DF10 | 729 (0.7%) | 718 (0.7%) | 11 (0.3%) |
| TCI and related syndromes | DG45 | 1,695 (1.6%) | 1,679 (1.6%) | 16 (0.4%) |
| Angina pectoris | DI20 | 753 (0.7%) | 745 (0.7%) | 8 (0.2%) |
| IHD | DI25 | 589 (0.5%) | 581 (0.6%) | 8 (0.2%) |
| Atrial fibrillation and flutter | DI48 | 5,583 (5.2%) | 5,511 (5.3%) | 72 (2.0%) |
| Heart failure | DI50 | 617 (0.6%) | 585 (0.6%) | 32 (0.9%) |
| Phlebitis and thrombophlebitis | DI80 | 1,293 (1.2%) | 1,271 (1.2%) | 22 (0.6%) |
| COPD without acute lower resp. tract infection | DJ44 | 2,523 (2.4%) | 2,393 (2.3%) | 130 (3.6%) |
| Cholelithiasis | DK80 | 573 (0.5%) | * | * |
| Hematemesis, melena, GI bleeding, disease of the digestive system unspecified | DK92 | 505 (0.5%) | 453 (0.4%) | 52 (1.5%) |
| Dorsalgia | DM54 | 1,160 (1.1%) | 1,143 (1.1%) | 17 (0.5%) |
| Pain in limb | DM796 | 1,203 (1.1%) | 1,192 (1.2%) | 11 (0.3%) |
| Abnormalities of the heartbeat | DR00 | 691 (0.6%) | 685 (0.7%) | 6 (0.2%) |
| Abnormalities of breathing | DR06 | 2,709 (2.5%) | 2,561 (2.5%) | 148 (4.1%) |
| Pain in throat and chest | DR07 | 4,136 (3.9%) | 4,088 (3.9%) | 48 (1.3%) |
| Abdominal and pelvic pain | DR10 | 5,408 (5.0%) | 5,234 (5.1%) | 174 (4.9%) |
| Nausea and vomiting | DR11 | 793 (0.7%) | 760 (0.7%) | 33 (0.9%) |
| Repeated falls | DR296 | 712 (0.7%) | 678 (0.7%) | 34 (1.0%) |
| Other symptoms and signs involving the nervous and musculoskeletal system | DR298 | 1,323 (1.2%) | 1,294 (1.2%) | 29 (0.8%) |
| Retention of urine | DR33 | 562 (0.5%) | 539 (0.5%) | 23 (0.6%) |
| Confusion, amnesia, other symptoms and signs involving cognitive functions and awareness | DR41 | 719 (0.7%) | 684 (0.7%) | 35 (1.0%) |
| Dizziness and giddiness | DR42 | 2,395 (2.2%) | 2,374 (2.3%) | 21 (0.6%) |
| Fever of other and unknown origin | DR50 | 688 (0.6%) | 663 (0.6%) | 25 (0.7%) |
| Headache | DR51 | 701 (0.7%) | * | * |
| Pain, unspecified | DR52 | 1,071 (1.0%) | 1,034 (1.0%) | 37 (1.0%) |
| Malaise and fatigue | DR53 | 1,467 (1.4%) | 1,404 (1.4%) | 63 (1.8%) |
| Syncope and collapse | DR55 | 3,575 (3.3%) | 3,534 (3.4%) | 41 (1.1%) |
| Edema, localized, universal, unspecified | DR60 | 513 (0.5%) | 494 (0.5%) | 19 (0.5%) |
| Encounter for medical observation for suspected diseases and conditions ruled out | DZ03 | 11,624 (10.9%) | 11,366 (11.0%) | 258 (7.2%) |
| Other diseases of the blood and blood-forming organs and certain disorders involved in the immune system | DD50-DD89† | 316 (0.3%) | 304 (0.3%) | 12 (0.3%) |
| Other diseases of the digestive system | DK15-DK93† | 1,897 (1.8%) | 1,841 (1.8%) | 56 (1.6%) |
| Other diseases of the eyes, ears, mouth, throat, and skin | DH00-DH95, DL00-DL99, DK00-DK14† | 1,042 (1.0%) | 1,027 (1.0%) | 15 (0.4%) |
| Other diseases of the genitourinary system | DN00-DN99† | 707 (0.7%) | 656 (0.6%) | 51 (1.4%) |
| Other diseases of the heart and circulatory system | DI00-DI99† | 2,942 (2.7%) | 2,828 (2.7%) | 114 (3.2%) |
| Other diseases of the musculoskeletal system and connective tissue | DM00-DM99† | 1,889 (1.8%) | 1,869 (1.8%) | 20 (0.6%) |
| Other diseases of the nervous system | DG00-DG99, DI60-DI69† | 1,700 (1.6%) | 1,639 (1.6%) | 61 (1.7%) |
| Other diseases of the respiratory system | DJ00-DJ99† | 1,256 (1.2%) | 1,147 (1.1%) | 109 (3.0%) |
| Other endocrine, nutritional, and metabolic disorders | DE00-DE90† | 678 (0.6%) | 641 (0.6%) | 37 (1.0%) |
| Other factors influencing health status and contact with health services | DZ00-DZ99† | 1,523 (1.4%) | 1,455 (1.4%) | 68 (1.9%) |
| Other injury and certain other consequences of external causes | DS00-DY09† | 763 (0.7%) | 746 (0.7%) | 17 (0.5%) |
| Other mental and behavioral disorders | DF00-DF99† | 746 (0.7%) | 688 (0.7%) | 58 (1.6%) |
| Neoplasms | DC00-DD48† | 1,306 (1.2%) | 1,193 (1.2%) | 113 (3.2%) |
| Other poisoning, intoxications, substance use, and adverse effects of medications | DF10-19, DT36-DT65, DT69.9† | 516 (0.5%) | * | * |
| Other symptoms and abnormal findings, not elsewhere classified | DR00-DR99† | 3,658 (3.4%) | 3,510 (3.4%) | 148 (4.1%) |
| Other infectious diseases | DA00-DB99, DD73.3, DE06.0, DE06.9, DE32.1, DG00-DG02, DG04-07, DH00, DH01.0, DH03.0-.1, DH04.0, DH04.3, DH05.0, DH06.1, DH10, DH13.0-.1, DH15.0, DH19.1-.2, DH22.0, DH32.0, DH44.0-.1, DH60.0-1, DH60.3, DH62.0-3, DH65.0-1, DH66.0-4, DH66.9, DH67.1, DH67.8, DH68.0 DH70.2, DH73.0, DH75.0, DH94.0, DI00-02, DI30.1, DI32.0-1, DI33.0, DI38, DI39.8, DI40.0,D I41, DI43.0, DI52.0-1, DI68.1, DI98.1, DJ00-J06, DJ09-J18, DJ20-22, DJ34.0, DJ36, DJ38.3D, DJ38.7G, DJ39.0-1, DJ39.8A, DJ44.0, DJ85.1-3, DJ86, DK04.0, DK04.6-7, DK05.2, DK11.2-3, DK12.2, DK13.0A, DK14.0A, DK20.9A, DK23.0-1, DK35, DK37, DK57.0, DK57.2, DK57.4, DK57.8, DK61, DK63.0, DK65.0, DK65.8I, DK67, DK75.0-1, DK77.0, DK80.0, DK80.3-4, DK81.0, DK83.0, DK85.9, DK93.0-1, DL00-03, DL05-08, DL88, DM00-01, DM46.1-5, DM49.0-3, DM60.0, DM60.8, DM63.0-2, DM65.0-1, DM68.0, DM71.0-1, DM86.0-2, DM86.9, DM90.0-2, DN10, DN12, DN13.6, DN15.1, DN16.0, DN20.0I, DN29.1, DN30.0, DN33.0, DN34.0-1, DN39.0, DN41, DN43.1, DN45.0, DN45.9, DN48.1-2, DN49, DN61, DN70-77, DO23, DO26.4, DO41.1, DO75.3, DO85, DO86, DO88.3, DO91, DO98, DT80.2, DT81.4, DT82.6-7, DT83.5-6, DT84.5-7, DT85.7, DT88.0, DT89.9† | 1,154 (1.1%) | 1,086 (1.0%) | 68 (1.9%) |

* rows containing n = ≤5
† not including ICD-10 codes in the above groups

***Comorbidity status***

**Table S2** Distribution (%) of Diseases of Charlson Comorbidity Index according to survival status

| **Comorbidity** | **Total cohort,** n = 107,132 | **Survivors,** n = 103,557(95%CI) | **Non-survivors,** n = 3,575 (95%CI) | **Risk difference,** non-survivors - survivors (95%CI)† |
| --- | --- | --- | --- | --- |
| Cancer | 14.1% | 13.9% | 21.3% | 7.4% (6.0, 8.7) |
| Metastatic disease | 1.8% | 1.7% | 5.3% | 3.6% (2.8, 4.3) |
| Myocardial infarction | 6.4% | 6.4% | 7.6% | 1.2% (0.3, 2.1) |
| Congestive heart failure | 9.8% | 9.5% | 17.6% | 8.1% (6.9, 9.4) |
| Peripheral vascular disease | 7.5% | 7.4% | 11.3% | 3.9% (2.9, 5.0) |
| Cerebrovascular disease | 16.3% | 16.0% | 24.8% | 8.8% (7.4, 10.3) |
| Dementia | 6.2% | 5.7% | 20.5% | 14.8% (13.5, 16.) |
| Chronic pulmonary disease | 16.2% | 16.0% | 22.5% | 6.5% (5.1, 7.9) |
| Connective tissue disease | 3.6% | 3.6% | 3.6% | 0.0% (-0.0, 0.0) |
| Peptic ulcer disease | 2.7% | 2.6% | 4.6% | 2.0% (1.3, 2.7) |
| Liver disease (mild) | 1.2% | 1.2% | 1.5% | 0.4% (0.1, 0.8) |
| Liver disease (moderate to severe) | 0.6% | 0.6% | 1.0% | 0.4% (0.1, 0.7) |
| Diabetes without complications | 9.6% | 9.5% | 11.1% | 1.6% (0.6, 2.7) |
| Diabetes with complications | 4.3% | 4.2% | 6.1% | 1.9% (1.1, 2.7) |
| Paraplegia and hemiplegia | 0.5% | 0.5% | 0.7% | 0.2% (0.1, 0.5) |
| Renal disease | 5.0% | 4.8% | 9.8% | 5.0% (4.0, 5.9) |
| AIDS | n ≤ 5* | n ≤ 5* | n ≤ 5* | n ≤ 5* |

* rows containing n = ≤5 have been concealed due to Danish law on data protection (GDPR)

† Absolute difference between proportions (survivors – non-survivors)

***Comparing included and excluded patients***

**Table S3** Comparison between those included and excluded in the study

| **Variable** | **Included**,  n= 107,132 | **Excluded*,**  n= 69,878 | **Risk difference** (95% CI)** |
| --- | --- | --- | --- |
| Age, median | 75.0 (70.0-82.0) | 74.0 (70.0-81.0) | 1.0 (1.0, 1.0) |
| Gender, Female | 52.7% | 49.3% | 3.4 (3.9 – 2.9) |
| Charlson Comorbidity  Index Score (CCI), median | 0 (0-2) | 0 (0-2) | 0.0 (0.0, 0.0) |
| 30-day mortality rate | 3.3% | 3.1% | 0.2 (0.1 – 0.4) |

*For those excluded, only the first hospitalization for each patient is considered

**For categorical variables, risk difference is defined as the absolute difference between proportions (included – excluded). For continuous variables, the median of difference is displayed using the Hodges-Lehman estimator of location of shift (included – excluded).

***Model calibration***

Calibration plots produced from the test set examine how the predicted probabilities reflect the observed probabilities of the data. For a perfectly calibrated model, the plot would be linear: e.g., if all patients who were predicted to have a 10% risk short-term mortality were gathered into one group, the observed/actual mortality rate of that group should be 10%. The level 0 model shows almost perfect calibration (Figure S1), but with very little variance in mortality predictions between patients (e.g., the model is perfectly calibrated because the model predicts all patients to have mortality risk close to the ¨average¨ risk of 3.3%). The level 5 model displays good overall model calibration and more diversity in mortality predictions.

**Figure S1** Calibration plots showing how model calibration changes with additional variables.

***Results from validation set***

**Table S4** Model performance on validation set

| **Model level (included variables)** | **AUC** | **Brier Score** |
| --- | --- | --- |
| Level 0  (Age, sex) | 0.691 | 0.0318 |
| Level 1 (Level 0 + discharge diagnosis, specialty) | 0.730 | 0.0314 |
| Level 2 (Level 1 + time of day at discharge, day of the week at time of discharge, length of stay) | 0.730 | 0.0314 |
| Level 3  (Level 2 + laboratory results from the admission, previous admission during the last 30 days prior to this admission) | 0.813 | 0.0294 |
| Level 4 (Level 3 + Diseases of Charlson Comorbidity Index, number of different prescription drugs redeemed within 6 months prior to index hospitalization) | 0.843 | 0.0290 |
| Level 5 (Level 4 + living situation, marital status, education level, disposable yearly income) | 0.843 | 0.0290 |
| Backwards selection model (Variables from level 5 model with positive variable importance only) | 0.839 | 0.0291 |

***Model median predictions***

**Table S5** Medians of predicted 30-day mortality risk, by outcome

| **Model** | **Survival-status** | **Median of predicted 30-day mortality risk (%)** |
| --- | --- | --- |
| Level 0 | Survivors | 2.2 |
| Level 0 | Non-survivors | 4.7 |
| Level 1 | Survivors | 2.2 |
| Level 1 | Non-survivors | 5.2 |
| Level 2 | Survivors | 2.2 |
| Level 2 | Non-survivors | 5.3 |
| Level 3 | Survivors | 1.5 |
| Level 3 | Non-survivors | 8.7 |
| Level 4 | Survivors | 1.4 |
| Level 4 | Non-survivors | 10.0 |
| Level 5 | Survivors | 1.3 |
| Level 5 | Non-survivors | 10.5 |
| Backwards selection model | Survivors | 1.3 |
| Backwards selection model | Non-survivors | 10.7 |

***Relative variable importance***Displayed importance rankings assume complete independence and no correlation between variables.

**Table S6** Relative variable importance, compared to the most important variable, age. Descending.

| **Variable** | **Relative importance (%)** |
| --- | --- |
| Age | 100.0 |
| Dementia, comorbidity | 43.9 |
| Number of different prescription drugs redeemed within 6 months prior to index hospitalization | 33.2 |
| C-reactive protein; P (mg/L) | 21.7 |
| eGFR (mL/min) | 14.7 |
| Creatinine; P (μmol/L) | 14.2 |
| Marital status | 14.1 |
| Previous admission, 30 days prior to index hospitalization | 13.6 |
| Living situation | 11.4 |
| Sodium ion; P (mmol/L) | 11.3 |
| Bilirubin; P (μmol/L) | 7.5 |
| Alkaline phosphatase; P (U/L) | 7.2 |
| Glucose; P (mmol/L) | 6.8 |
| Hemoglobin; B (mmol/L) | 6.8 |
| Cancer diagnosis, comorbidity | 6.5 |
| Sex | 6.1 |
| Lower respiratory tract infection, discharge diagnosis | 5.7 |
| Alanine transaminase; P (U/L) | 3.9 |
| Metastatic disease, comorbidity | 3.7 |
| Malaise and fatigue, discharge diagnosis | 3.7 |
| Medical/surgical specialty from admission | 3.5 |
| Gastric ulcer disease, comorbidity | 3.4 |
| Time of day of discharge | 3.3 |
| COPD without acute lower respiratory tract infection, discharge diagnosis | 3.3 |
| Encounter for medical observation for suspected diseases and conditions ruled out, discharge diagnosis | 3.2 |
| Potassium ion; P (mmol/L) | 3.0 |
| Albumin; P (g/L) | 2.8 |
| Day of the week at time of discharge | 2.6 |
| Cerebrovascular disease, comorbidity | 2.6 |
| Diabetes without complications, comorbidity | 2. 4 |
| Pulmonary disease, comorbidity | 2.0 |
| Neoplasm, discharge diagnosis | 2.0 |
| Educational level | 1.7 |
| Dehydration. Other disorders of fluid, electrolyte and acid-base balance, discharge diagnosis | 1.4 |
| Traumatic injuries, lesions, fractures, discharge diagnosis | 1.3 |
| Abnormalities of breathing, discharge diagnosis | 1.3 |
| Fever of other and unknown origin | 1.2 |
| INR | 1.2 |
| Heart failure, discharge diagnosis | 1.2 |
| Constipation, discharge diagnosis | 1.1 |
| Thrombocytes; B (109/L) | 1.1 |
| Angina pectoris, discharge diagnosis | 1.0 |
| Total yearly income | 1.0 |
| Hematemesis, melena, GI bleeding, disease of the digestive system unspecified, discharge diagnosis | 0.7 |
| Renal disease, comorbidity | 0.7 |
| Abdominal and pelvic pain, discharge diagnosis | 0.6 |
| Poisoning, discharge diagnosis | 0.6 |
| Epilepsy. Status epilepticus, discharge diagnosis | 0.6 |
| Edema, discharge diagnosis | 0.5 |
| Urinary tract stones, discharge diagnosis | 0.4 |
| TCI and related syndromes, discharge diagnosis | 0.2 |
| Abnormalities of the heartbeat, discharge diagnosis | 0.2 |
| Headache, discharge diagnosis | 0.1 |
| Retention of urine, discharge diagnosis | 0.1 |
| Myocardial infarction, comorbidity | 0.1 |
| Other diseases of the blood and blood-forming organs and certain disorders involved in the immune system, discharge diagnosis | 0.0 |
| Other diseases of the digestive system, discharge diagnosis | 0.0 |
| Other diseases of the eyes, ears, mouth, throat, and skin, discharge diagnosis | 0.0 |
| Other diseases of the genitourinary system, discharge diagnosis | 0.0 |
| Other diseases of the heart and circulatory system, discharge diagnosis | 0.0 |
| Other diseases of the musculoskeletal system and connective tissue, discharge diagnosis | 0.0 |
| Other diseases of the nervous system, discharge diagnosis | 0.0 |
| Other diseases of the respiratory system, discharge diagnosis | 0.0 |
| Other endocrine, nutritional, and metabolic disorders, discharge diagnosis | 0.0 |
| Other factors influencing health status and contact with health services, discharge diagnosis | 0.0 |
| Other infectious diseases, discharge diagnosis | 0.0 |
| Other injury and certain other consequences of external causes, discharge diagnosis | 0.0 |
| Other mental and behavioral disorders , discharge diagnosis | 0.0 |
| Other poisoning, intoxications, substance use, and adverse effects of medications , discharge diagnosis | 0.0 |
| Other symptoms and abnormal findings, not elsewhere classified discharge diagnosis | 0.0 |
| AIDS, comorbidity | 0.0 |
| Cholelithiasis, discharge diagnosis | 0.0 |
| Gastroenteritis or gastrocolitis, discharge diagnosis | -0.1 |
| Other infections of the digestive system, discharge diagnosis | -0.1 |
| Length of stay, hours | -0.1 |
| Diabetes (type 1, type 2, other, non-specified), discharge diagnosis | -0.2 |
| Upper respiratory tract infection, discharge diagnosis | -0.2 |
| Hernias (not including hiatus hernias), discharge diagnosis | -0.3 |
| Dorsalgia, discharge diagnosis | -0.5 |
| Diverticulitis, diverticulosis/diverticulosis w perforation or abscess, discharge diagnosis | -0.5 |
| Other skin and subcutaneous infections, discharge diagnosis | -0.5 |
| Anemia (not including acute posthemorrhagic anemia), discharge diagnosis | -0.6 |
| Alcohol related disorders, discharge diagnosis | -0.7 |
| Pain in limb, discharge diagnosis | -0.7 |
| Mild liver disease, comorbidity | -0.7 |
| Erysipelas, discharge diagnosis | -0.8 |
| Hypertensive diseases, discharge diagnosis | -0.8 |
| Phlebitis and thrombophlebitis, discharge diagnosis | -0.8 |
| Diabetes w complications, comorbidity | -0.9 |
| Moderate or severe liver disease, comorbidity | -0.9 |
| Repeated falls, discharge diagnosis | -1.1 |
| Hemiplegia, comorbidity | -1.1 |
| Peripheral vascular disease, comorbidity | -1.2 |
| Dizziness and giddiness, discharge diagnosis | -1.3 |
| Rheumatic disease, comorbidity | -1.3 |
| Pain, unspecified, discharge diagnosis | -1.3 |
| Atrial fibrillation and flutter, discharge diagnosis | -1.5 |
| IHD, discharge diagnosis | -1.7 |
| Pain in throat and chest, discharge diagnosis | -1.7 |
| Syncope and collapse, discharge diagnosis | -1.8 |
| Complications of surgical and medical care, not elsewhere classified, discharge diagnosis | -1.8 |
| Nausea and vomiting, discharge diagnosis | -1.8 |
| Other symptoms and signs involving the nervous and musculoskeletal system, discharge diagnosis | -2.2 |
| Perianal/perirectal hemorrhoids, hematomas, and fissures, other diseases of anus and rectum, discharge diagnosis | -2.3 |
| Brain bleeding, infarction, or stroke, discharge diagnosis | -2.4 |
| Confusion, amnesia, other symptoms and signs involving cognitive functions and awareness, discharge diagnosis | -2.4 |
| Cystitis, discharge diagnosis | -2.5 |
| Heart failure, comorbidity | -3.7 |
| Leukocytes; B (109/L) | -3.9 |

***Partial dependence plots***Calculations do not account for possible variables interactions and assume variable independence (Figure S2).

**Figure S2** Partial dependence plots for the 20 variables with greatest variable importance. Y-axes depict predicted survival (%).
